# Supplementary material
Source: Springer Nature journal article supplement (https://www.springermedizin.de/resource/supplementary/12872_2011_365_MOESM2_ESM.pdf/9429782)

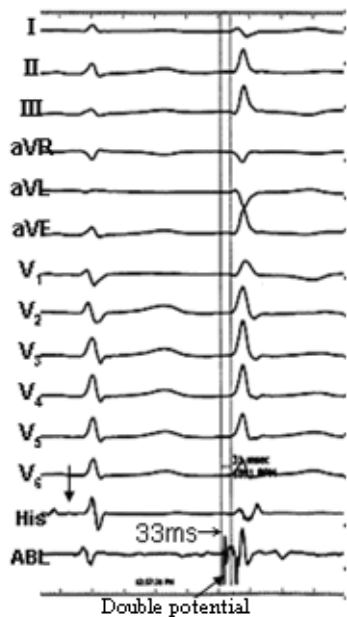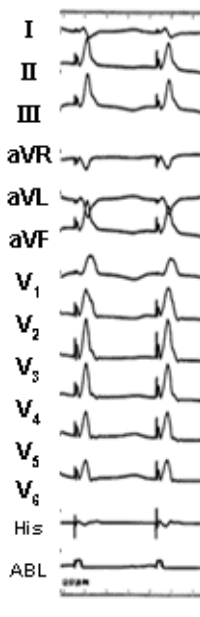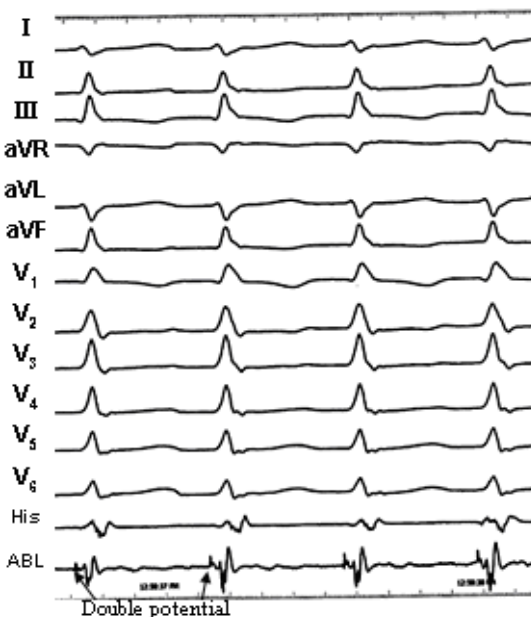

Supplement: MOESM2 [file 9429782]
